# Supplementary material for: Modulation of human endogenous retrovirus (HERV) transcription during persistent and de novo HIV-1 infection
Source: PubMed Central journal article supplement (PMC4375885; doi:10.1186/s12977-015-0156-6), 2015-03-24
Supplement: 12977_2015_156_MOESM3_ESM.pdf [file 12977_2015_156_MOESM3_ESM.pdf]

## HERV-K(HML-2) activity in PBMCs of six healthy individuals

| Provirus <sup>a</sup>                   | Chromosome band | Number of clones (% cloning frequency) |            |            |            |            |            |
|-----------------------------------------|-----------------|----------------------------------------|------------|------------|------------|------------|------------|
|                                         |                 | 1                                      | 2          | 3          | 4          | 5          | 6          |
| ERVK-7 <sup>b</sup> (K102, K50a, c1_B)  | 1q22            | 8 (36.4)                               | 15 (75.0)  | 5 (19.2)   | 4 (23.5)   | 9 (50.0)   | 21 (87.5)  |
| ERVK-18 (K110, K18, c1_C)               | 1q23.3          | 9 (40.9)                               | 2 (10.0)   | 15 (57.7)  | 10 (58.8)  | 4 (22.2)   | -          |
| ERVK-5 (K(II))                          | 3q12.3          | -                                      | -          | 2 (7.7)    | -          | 1 (5.6)    | 1 (4.2)    |
| ERVK-3 <sup>b,c</sup> (K106, K68, c3_B) | 3q13.2          | -                                      | -          | 1 (3.8)    | -          | -          | 1 (4.2)    |
| ERVK-11 <sup>b</sup> (K117, K50b)       | 3q27.2          | 1 (4.5)                                | -          | -          | -          | -          | -          |
| ERVK-10 <sup>b</sup> (K107, K10, c5)    | 5q33.3          | 1 (4.5)                                | -          | -          | -          | -          | -          |
| ERVK-8 <sup>b</sup> (K115)              | 8p23.1          | -                                      | 1 (5.0)    | -          | 2 (11.8)   | -          | -          |
| ERVK-17 <sup>b</sup> (c10_B)            | 10q24.2         | -                                      | -          | 1 (3.8)    | -          | -          | -          |
| K(OLD-AC004127)                         | 11q12.3         | -                                      | -          | -          | -          | 1 (5.6)    | -          |
| ERVK-20 (K37, c11_B)                    | 11q23.3         | -                                      | -          | 1 (3.8)    | -          | -          | -          |
| ERVK-19 <sup>b</sup> (c19)              | 19q11           | -                                      | -          | -          | -          | -          | 1 (4.2)    |
| K(OLD-AC012309)                         | 19q13.12        | 3 (13.6)                               | 1 (5.0)    | 1 (3.8)    | 1 (5.9)    | 3 (16.7)   | -          |
| Total number of clones                  |                 | 22 (100.0)                             | 20 (100.0) | 26 (100.0) | 17 (100.0) | 18 (100.0) | 24 (100.0) |

<sup>a</sup> Designation according to [87], aliases are in parentheses.

<sup>b</sup> Human specific HERV-K(HML-2) proviruses [89].

<sup>c</sup> Polymorphic in the human genome [89].
