# Supplementary material for: Modulation of human endogenous retrovirus (HERV) transcription during persistent and de novo HIV-1 infection
Source: PubMed Central journal article supplement (PMC4375885; doi:10.1186/s12977-015-0156-6), 2015-03-24

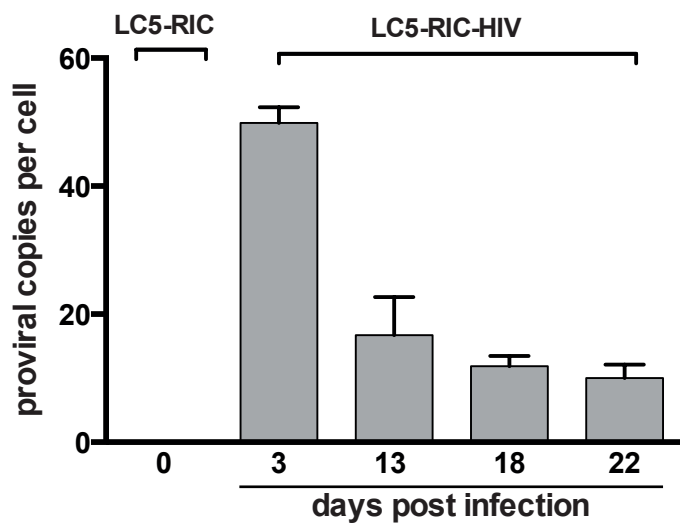

Supplement: 12977_2015_156_MOESM4_ESM.pdf [file 12977_2015_156_MOESM4_ESM.pdf]
