# Supplementary material for: Modulation of human endogenous retrovirus (HERV) transcription during persistent and de novo HIV-1 infection
Source: PubMed Central journal article supplement (PMC4375885; doi:10.1186/s12977-015-0156-6), 2015-03-24
Supplement: 12977_2015_156_MOESM5_ESM.pdf [file 12977_2015_156_MOESM5_ESM.pdf]

### HERV-K(HML-3) transcription in *de novo* and persistently infected LC5 cells

| Provirus <sup>a</sup>  | Chromosome band | Location of amplicon in genome <sup>b</sup> | Number of clones (% cloning frequency) |                          |           |                      |
|------------------------|-----------------|---------------------------------------------|----------------------------------------|--------------------------|-----------|----------------------|
|                        |                 |                                             | LC5-RIC                                | LC5-RIC-HIV <sup>c</sup> | LC5       | LC5-HIV <sup>d</sup> |
| ERVK9-1 (K102B)        | 1q21.2          | 148897257 - 148897929                       | 28 (57.1)                              | 23 (51.1)                | 13 (28.9) | 29 (46,7)            |
| ERVK9-2 (K22C)         | 2p24.1          | 19990171 - 19990837                         | -                                      | 2 (4.4)                  | -         | 2 (3.2)              |
| K105B <sup>e</sup>     | 3q21.3          | 131107276 - 131107940                       | 8 (16.3)                               | 13 (28.9)                | 17 (37.7) | 19 (30.6)            |
| ERVK9-3 (K26C)         | 3q27.2          | 186214162 - 186214832                       | 2 (4.1)                                | -                        | -         | 3 (4.8)              |
| ERVK9-4 (K83B)         | 5p13.2          | 34818528 - 34819198                         | 1 (2.0)                                | 1 (2.2)                  | 1 (2.2)   | 3 (4.8)              |
| ERVK9-5 (K104B)        | 5p15.33         | 1631842 - 1632506                           | 4 (8.2)                                | 4 (8.9)                  | -         | -                    |
| ERVK9-6 (K58B)         | 6q21            | 111349419 - 111350092                       | -                                      | -                        | 1 (2.2)   | -                    |
| ERVK9-7 (K103B)        | 7p14.2          | 35917184 - 35917857                         | 3 (6.1)                                | 2 (4.4)                  | 3 (6.7)   | 2 (3.2)              |
| ERVK9-8 (K49B)         | 8q11.23         | 55150562 - 55151221                         | -                                      | -                        | 1 (2.2)   | -                    |
| ERVK9-9 (K18B)         | 17p13.2         | 6720109 - 6720772                           | -                                      | -                        | 1 (2.2)   | -                    |
| ERVK9-10 (K114B)       | 17q21.32        | 44603909 - 44604585                         | -                                      | -                        | 5 (11.1)  | 2 (3.2)              |
| ERVK9-11 (K79B)        | 19q13.2         | 44118558 - 44119192                         | 3 (6.1)                                | -                        | 3 (6.7)   | 2 (3.2)              |
| Total number of clones |                 |                                             | 49 (100)                               | 45 (100)                 | 45 (100)  | 62 (100)             |

<sup>a</sup> Designation according to [87], aliases are in parentheses.

<sup>b</sup> According to the March 2006 assembly (NCBI36/hg18) of the human genome sequence at the Human Genome Browser [88].

<sup>c</sup> *de novo* infected LC5-RIC cells.

<sup>d</sup> persistently infected LC5 cells.

<sup>e</sup> The provirus sequence is transcribed as part of lncRNA TMCC1-AS1.
